# Supplementary material
Source: Springer Nature journal article supplement (https://www.springermedizin.de/resource/supplementary/12913_2014_3495_MOESM7_ESM.pdf/9532878)
Supplement: MOESM7 [file 9532878]

# Funnel Plot of Standard Error by Std diff in means

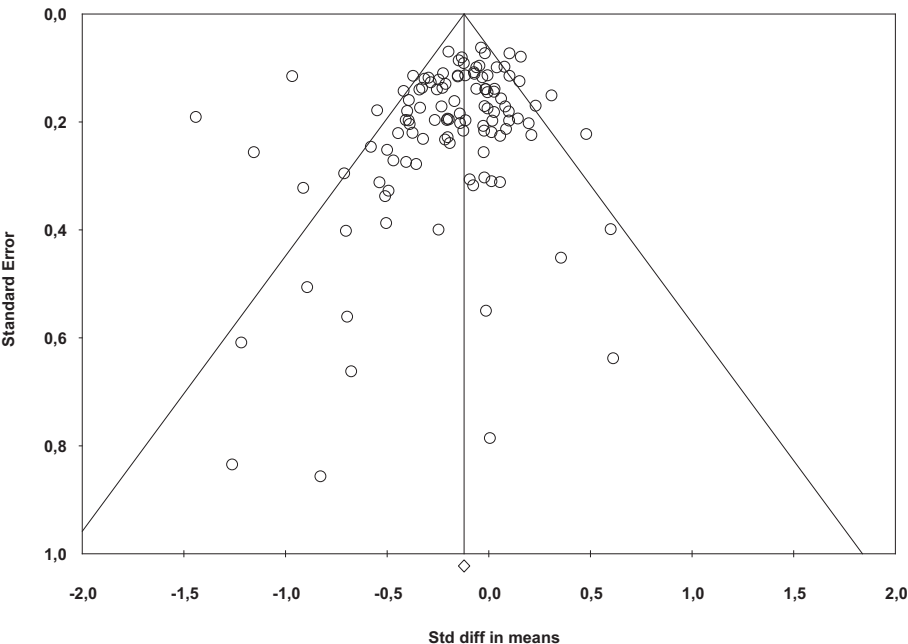

## Egger's regression intercept

|                            |           |
|----------------------------|-----------|
| Intercept                  | -0,91132  |
| Standard error             | 0,32477   |
| 95% lower limit (2-tailed) | -1,55481  |
| 95% upper limit (2-tailed) | -0,26783  |
| t-value                    | 2,80605   |
| df                         | 112,00000 |
| P-value (1-tailed)         | 0,00296   |
| P-value (2-tailed)         | 0,00592   |
